# Supplementary material for: CRISPR-Cas12a-Based Detection for the Major SARS-CoV-2 Variants of Concern
Source: PubMed Central journal article supplement (PMC8597640; doi:10.1128/spectrum.01017-21), 2021-11-17
Supplement: spectrum01017-21_supp_1_seq14.pdf [file spectrum01017-21_supp_1_seq14.pdf]

**Supplementary Table S1. Detailed information of SARS-CoV-2 genomes used for multiple alignment**

| Accession | Pangolin lineage | WHO classification | Category           | Length (bp) | Location                                 |
|-----------|------------------|--------------------|--------------------|-------------|------------------------------------------|
| MN908947  | B                |                    |                    | 29903       | China                                    |
| MW913362  | B.1.1.7          | Alpha              | variant of concern | 29763       | Austria: Upper Austria, Voecklabruck     |
| OU514166  | B.1.1.7          | Alpha              | variant of concern | 29810       | Germany:Europe/Germany/Baden-Wurttemberg |
| OU514176  | B.1.1.7          | Alpha              | variant of concern | 29813       | Germany:Europe/Germany/Baden-Wurttemberg |
| MZ350105  | B.1.1.7          | Alpha              | variant of concern | 29756       | Ghana                                    |
| MZ350109  | B.1.1.7          | Alpha              | variant of concern | 29773       | Ghana                                    |
| MZ266365  | B.1.1.7          | Alpha              | variant of concern | 29763       | Hong Kong                                |
| BS001137  | B.1.1.7          | Alpha              | variant of concern | 29863       | Japan: Tochigi                           |
| BS001138  | B.1.1.7          | Alpha              | variant of concern | 29862       | Japan: Tochigi                           |
| BS001139  | B.1.1.7          | Alpha              | variant of concern | 29877       | Japan: Tochigi                           |
| BS001140  | B.1.1.7          | Alpha              | variant of concern | 29862       | Japan: Tochigi                           |
| OU538849  | B.1.1.7          | Alpha              | variant of concern | 29884       | Switzerland:SO                           |
| OU538851  | B.1.1.7          | Alpha              | variant of concern | 29884       | Switzerland:BE                           |
| MZ888516  | B.1.1.7          | Alpha              | variant of concern | 29882       | Thailand: Kamphaeng Phet                 |
| OU562607  | B.1.1.7          | Alpha              | variant of concern | 29884       | United Kingdom:Scotland                  |
| OU562608  | B.1.1.7          | Alpha              | variant of concern | 29884       | United Kingdom:Scotland                  |
| MZ895877  | B.1.1.7          | Alpha              | variant of concern | 29521       | USA: Washington                          |
| MZ298839  | B.1.351          | Beta               | variant of concern | 29764       | Hong Kong                                |
| MZ298840  | B.1.351          | Beta               | variant of concern | 29764       | Hong Kong                                |
| MW981442  | B.1.351          | Beta               | variant of concern | 29848       | South Africa                             |
| MZ202314  | B.1.351          | Beta               | variant of concern | 29783       | South Africa                             |
| MZ376663  | B.1.351          | Beta               | variant of concern | 29848       | South Africa                             |
| OU539352  | B.1.351          | Beta               | variant of concern | 29885       | Switzerland:AG                           |

|          |           |       |                    |       |                          |
|----------|-----------|-------|--------------------|-------|--------------------------|
| OU525106 | B.1.351   | Beta  | variant of concern | 29885 | United Kingdom:England   |
| MZ879365 | B.1.351   | Beta  | variant of concern | 29782 | USA: Colorado            |
| MZ913100 | B.1.351   | Beta  | variant of concern | 29712 | USA: New Mexico          |
| LC643036 | B.1.617.2 | Delta | variant of concern | 29875 | Japan: Tokyo             |
| LC643044 | B.1.617.2 | Delta | variant of concern | 29878 | Japan: Tokyo             |
| MZ854386 | B.1.617.2 | Delta | variant of concern | 29830 | Sierra Leone             |
| MZ854387 | B.1.617.2 | Delta | variant of concern | 29831 | Sierra Leone             |
| MZ854389 | B.1.617.2 | Delta | variant of concern | 29830 | Sierra Leone             |
| MZ853946 | B.1.617.2 | Delta | variant of concern | 29890 | South Korea              |
| OU539261 | B.1.617.2 | Delta | variant of concern | 29893 | Switzerland:TG           |
| OU539690 | B.1.617.2 | Delta | variant of concern | 29890 | Switzerland:ZH           |
| MZ888532 | B.1.617.2 | Delta | variant of concern | 29835 | Thailand: Kamphaeng Phet |
| MZ888533 | B.1.617.2 | Delta | variant of concern | 29809 | Thailand: Kamphaeng Phet |
| OU562629 | B.1.617.2 | Delta | variant of concern | 29890 | United Kingdom:England   |
| MZ896136 | B.1.617.2 | Delta | variant of concern | 29516 | USA: Oregon              |
| MZ477746 | P.1       | Gamma | variant of concern | 29741 | Brazil: Parana           |
| MZ477748 | P.1       | Gamma | variant of concern | 29738 | Brazil: Parana           |
| MW938104 | P.1       | Gamma | variant of concern | 29874 | Peru                     |
| OU539784 | P.1       | Gamma | variant of concern | 29894 | Switzerland:AG           |
| OU539830 | P.1       | Gamma | variant of concern | 29894 | Switzerland:GR           |
| OU539894 | P.1       | Gamma | variant of concern | 29894 | Switzerland:ZH           |
| OU492255 | P.1       | Gamma | variant of concern | 29898 | United Kingdom:England   |
| OU565182 | P.1       | Gamma | variant of concern | 29898 | United Kingdom:Scotland  |
| MZ896179 | P.1       | Gamma | variant of concern | 29531 | USA: Oregon              |
| MZ896359 | P.1       | Gamma | variant of concern | 29827 | USA: Minnesota           |

|          |           |         |                     |       |                                 |
|----------|-----------|---------|---------------------|-------|---------------------------------|
| MZ896669 | P.1       | Gamma   | variant of concern  | 29808 | USA: California                 |
| MZ911221 | B.1.427   | Epsilon | variant of interest | 29864 | USA: Arizona, Pima              |
| MZ375854 | B.1.427   | Epsilon | variant of interest | 29870 | Mexico: B.C.                    |
| MZ375858 | B.1.427   | Epsilon | variant of interest | 29833 | Mexico: B.C.                    |
| MZ943834 | B.1.429   | Epsilon | variant of interest | 29780 | USA: California                 |
| MZ687447 | B.1.429   | Epsilon | variant of interest | 29838 | USA: Tennessee, Davidson county |
| OU282717 | B.1.429   | Epsilon | variant of interest | 29903 | United Kingdom:Wales            |
| OU235436 | B.1.429   | Epsilon | variant of interest | 29903 | United Kingdom:England          |
| MZ277390 | B.1.429   | Epsilon | variant of interest | 29891 | Taiwan                          |
| MZ746235 | B.1.617.1 | Kappa   | variant of interest | 29791 | USA: Utah                       |
| MZ724425 | B.1.617.1 | Kappa   | variant of interest | 29788 | India                           |
| MZ571142 | B.1.617.1 | Kappa   | variant of interest | 29818 | Morocco                         |
| MZ562746 | B.1.617.1 | Kappa   | variant of interest | 29837 | India: Madhya Pradesh           |
| MZ538882 | B.1.617.1 | Kappa   | variant of interest | 29823 | USA: FL                         |
| OU322235 | B.1.617.1 | Kappa   | variant of interest | 29559 | Germany:Europe/Germany/Berlin   |
| OU290035 | B.1.617.1 | Kappa   | variant of interest | 29893 | United Kingdom:England          |
| MZ487800 | B.1.617.1 | Kappa   | variant of interest | 29809 | USA: DC                         |
| OU265178 | B.1.617.1 | Kappa   | variant of interest | 29902 | United Kingdom:Wales            |
| OU247018 | B.1.617.1 | Kappa   | variant of interest | 29902 | United Kingdom:England          |
| OU254949 | B.1.617.1 | Kappa   | variant of interest | 29902 | United Kingdom:Wales            |
| MZ397173 | B.1.617.1 | Kappa   | variant of interest | 29830 | Myanmar                         |
| MZ397175 | B.1.617.1 | Kappa   | variant of interest | 29812 | Myanmar                         |
| MZ397176 | B.1.617.1 | Kappa   | variant of interest | 29822 | Myanmar                         |
| MZ397177 | B.1.617.1 | Kappa   | variant of interest | 29823 | Myanmar                         |
| OU168413 | B.1.617.1 | Kappa   | variant of interest | 29795 | Germany:Europe/Germany/Saxony   |

|          |           |        |                     |       |                               |
|----------|-----------|--------|---------------------|-------|-------------------------------|
| OU172184 | B.1.617.1 | Kappa  | variant of interest | 29835 | Switzerland:SO                |
| OU182966 | B.1.617.1 | Kappa  | variant of interest | 29850 | Switzerland:BL                |
| MZ363839 | B.1.617.1 | Kappa  | variant of interest | 29801 | India                         |
| MZ332524 | B.1.617.1 | Kappa  | variant of interest | 29801 | India                         |
| MZ332527 | B.1.617.1 | Kappa  | variant of interest | 29801 | India                         |
| OU061269 | B.1.617.1 | Kappa  | variant of interest | 29902 | United Kingdom:Scotland       |
| LC633761 | B.1.617.1 | Kappa  | variant of interest | 29890 | Japan                         |
| MZ026886 | B.1.617.1 | Kappa  | variant of interest | 29525 | Bahrain                       |
| MZ953185 | C.37      | Lambda | variant of interest | 29805 | USA: California               |
| MZ953277 | C.37      | Lambda | variant of interest | 29801 | USA: Massachusetts            |
| MZ937666 | C.37      | Lambda | variant of interest | 29379 | USA: Illinois                 |
| MZ942542 | C.37      | Lambda | variant of interest | 29653 | USA: Kentucky                 |
| MZ908711 | C.37      | Lambda | variant of interest | 29785 | USA: Virginia                 |
| MZ857990 | C.37      | Lambda | variant of interest | 29750 | USA: Tennessee                |
| OU517038 | C.37      | Lambda | variant of interest | 29795 | Germany:Europe/Germany/Hesse  |
| OU356036 | C.37      | Lambda | variant of interest | 29873 | United Kingdom:England        |
| OU351967 | C.37      | Lambda | variant of interest | 29873 | Switzerland:GE                |
| MZ496613 | C.37      | Lambda | variant of interest | 29794 | Peru                          |
| OU268528 | C.37      | Lambda | variant of interest | 29873 | Switzerland:GE                |
| OU100999 | C.37      | Lambda | variant of interest | 29752 | Germany:Europe/Germany/Berlin |
| OU053018 | C.37      | Lambda | variant of interest | 29873 | United Kingdom:England        |
| MZ275295 | C.37      | Lambda | variant of interest | 29781 | Peru                          |
| MZ275301 | C.37      | Lambda | variant of interest | 29798 | Peru                          |

**Supplementary Table S2. Summary of DNA target sequences used for plasmid construction**

| Gene fragments      | Length (bp) | Sequence (5'→3')                                                                                                                                                                                                                                                                                                                                                                                                                                                                                                                                                                                                                                                                                                                                                                                                                                                                                                                                                                                                                                                                                                                                                                                                                                                                                                                                                                                                                                                                                                                                                                                                                                                                                                                                                                                                                             |
|---------------------|-------------|----------------------------------------------------------------------------------------------------------------------------------------------------------------------------------------------------------------------------------------------------------------------------------------------------------------------------------------------------------------------------------------------------------------------------------------------------------------------------------------------------------------------------------------------------------------------------------------------------------------------------------------------------------------------------------------------------------------------------------------------------------------------------------------------------------------------------------------------------------------------------------------------------------------------------------------------------------------------------------------------------------------------------------------------------------------------------------------------------------------------------------------------------------------------------------------------------------------------------------------------------------------------------------------------------------------------------------------------------------------------------------------------------------------------------------------------------------------------------------------------------------------------------------------------------------------------------------------------------------------------------------------------------------------------------------------------------------------------------------------------------------------------------------------------------------------------------------------------|
| Wild-type <i>Se</i> | 3822        | ATGTTTGTTTTTTTTGTATTGCCACTAGTCTCTAGTCAGTGTGTTAATCTTACAACCAGAACTCAATTACCCCCTGCATACAC<br>TAATTCCTTTCACACGTGGTGTATTACCCTGACAAAGTTTTTCAGATCCTCAGTTTTACATTCAACTCAGGACTTGTCTTACCTT<br>TCTTTTCCAATGTTACTTGGTTCATGCTATAACATGTCTCTGGGACCAATGGTACTAAGAGGTTTGCTAACCCCTGTCCTACCATT<br>AATGATGGTGTATTGTTGCTTCCACTGAGAAGTCTAACATAATAAGAGGCTGGATTTTTGGTACTACTTTAGATTTCGAAGACCC<br>AGTCCCTACTTATTGTTAATAACGCTACTAATGTTGTTATTAAGTCTGTGAATTTCAATTTTGTAAATGATCCATTTTTGGGTGTT<br>TATTACCACAAAAACAACAAAAGTTGGATGGAAAGTGAGTTCAGAGTTTATTCTAGTGCGAATAATTGCACTTTTGAATATGTC<br>TCTCAGCCTTTTCTTATGGACCTTGAAGGAAAACAGGGTAATTTCAAAAATCTTAGGGAATTTGTGTTAAGAATATTGATGGTT<br>ATTTTAAAATATATTCTAAGCACACGCCTATTAATTTAGTGCCTGGTCTCCCTCAGGGTTTTTCGGCTTTAGAACCATTGGTAGA<br>TTTGCCAATAGGTATTAACATCACTAGGTTTCAAACCTTACTTGCTTTACATATAAGTTATTTGACTCCTGGTGATTCTTCTTCAG<br>GTTGGACAGCTGGTGCTGCAGCTTATTATGTGGGTTATCTTCAACCTAGGACTTTTCTATTAAAATATAATGAAAATGGAACCAT<br>TACAGATGCTGTAGACTGTGCACTTGACCCTCTCTCAGAAACAAAGTGTACGTTGAAATCCTTCACTGTAGAAAAGGAATCTA<br>TCAAACCTTCTAACTTTAGAGTCCAACCAACAGAATCTATTGTTAGATTTCTAATATTACAAACTTGTGCCCTTTTGGTGAAGTT<br>TTTAACGCCACCAGATTTGCATCTGTTTATGCTTGGAACAGGAAGAGAATCAGCAACTGTGTTGCTGATTATTCTGTCCTATATA<br>ATTCGCATCATTTTCCACTTTTAAAGTGTTATGGAGTGTCTCCTACTAAATTAATGATCTCTGCTTTACTAATGTCTATGCAGAT<br>TCATTTGTAATTAGAGGTGATGAAGTCAGACAAATCGCTCCAGGGCAAACCTGGAAACATTGCTGATTATAATTATAAATTACCA<br>GATGATTTTACAGGCTGCGTTATAGCTTGGAAATCTAACAATCTTGATTCTAAGGTTGGTGGTAATTATAATTACCTGTTTAGAT<br>TGTTTAGGAAGTCTAATCTCAAACCTTTGAGAGAGATATTTCAAACCTGAAATCTATCAGGCCGGTAGCACACCTTGTAATGGTG<br>TTAAAGGTTTTAATTGTTACTTTCCTTTACAATCATATGGTTTCAAACCCACTTATGGTGTTGGTTACCAACCATAACAGAGTAGT<br>AGTACTTCTTTTGAACCTTCTACATGCACCAGCAACTGTTTGTGGACCTAAAAGTCTACTAATTTGGTTAAAACAATGTGTC<br>AATTTCAACTTCAATGGTTTAAACAGGCACAGGTGTTCTTACTGAGTCTAACAAAAAGTTTCTGCCTTTCCAACAATTTGGCAGAG |

ACATTGATGACACTACTGATGCTGTCCGTGATCCACAGACACTTGAGATTCTTGACATTACACCATGTTCTTTTTGGTGGTGTTCAG  
TGTTATAACACCAGGAACAAATACTTCTAACCAGGTTGCTGTTCTTTATCAGGGTGTAACTGCACAGAAGTCCCTGTTGCTATT  
CATGCAGATCAACTTACTCCTACTTGGCGTGTTTATTCTACAGGTTCTAATGTTTTTCAAACACGTGCAGGCTGTTTAATAGGGG  
CTGAACATGTCAACAACCTCATATGAGTGTGACATACCCATTGGTGCAGGTATATGCGCTAGTTATCAGACTCAGACTAATTCTC  
ATCGGCGGGCACGTAGTGTAGCTAGTCAATCCATCATTGCCTACACTATGTCACCTGGTGTAGAAAATTCAGTTGCTTACTCTAA  
TAACTCTATTGCCATACCCATAAATTTTACTATTAGTGTACCACAGAAATTCTACCAGTGTCTATGACCAAGACATCAGTAGAT  
TGTACAATGTACATTTGTGGTGATTCAACTGAATGCAGCAATCTTTTGTGCAATATGGCAGTTTTTGTACACAATTAACCGTG  
CTTTAACTGGAATAGCTGTTGAACAAGACAAAAACCCCAAGAAGTTTTTGCACAAGTCAAACAAATTTACAAAACACCACCA  
ATTAAGATTTTTGGTGGTTTTAATTTTTCACAAATATTACCAGATCCATCAAAACCAAGCAAGAGGTCATTTATTGAAGATCTAC  
TTTTCAACAAAGTGACACTTGCAGATGCTGGCTTCATCAAACAATATGGTGATTGCCTTGGTGATATTGCTGCTAGAGACCTCAT  
TTGTGCACAAAAGTTTAAACGGCCTTACTGTTTTGCCACCTTTGCTCACAGATGAAATGATTGCTCAATACACTTCTGCACTGTTA  
GCGGGTACAATCACTTCTGGTTGGACCTTTGGTGCAGGTGCTGCATTACAAATACCATTTGCTATGCAAATGGCTTATAGGTTTA  
ATGGTATTGGAGTTACACAGAATGTTCTCTATGAGAACCAAAAATTGATTGCCAACCAATTTAATAGTGCTATTGGCAAAATTC  
AAGACTCACTTTCTTCCACAGCAAGTGCACCTTGGAAAACCTCAAGATGTGGTCAACCAAAAATGCACAAGCTTTAAACACGCTTG  
TTAAACAACCTTAGCTCCAATTTTTGGTGCAATTTCAAGTGTTTTAAATGATATCCTTGCACGTCTTGACAAAGTTGAGGCTGAAGT  
GCAAATTGATAGGTTGATCACAGGCAGACTTCAAAGTTTGCAGACATATGTGACTCAACAATTAATTAGAGCTGCAGAAATCA  
GAGCTTCTGCTAATCTTGCTGCTACTAAAATGTCAGAGTGTGTACTTGGACAATCAAAAAGAGTTGATTTTTGTGGAAAGGGCT  
ATCATCTTATGTCCTTCCCTCAGTCAGCACCTCATGGTGTAGTCTTCTTGCATGTGACTTATGTCCTTGCACAAGAAAAGAACTT  
CACAACCTGCTCCTGCCATTTGTCATGATGGAAAAGCACACTTTCCTCGTGAAGGTGTCTTTGTTTCAAATGGCACACACTGGTTT  
GTAACACAAAGGAATTTTTATGAACCACAAATCATTACTACACACAACACATTTGTGTCTGGTAACTGTGATGTTGTAATAGGA  
ATTGTCAACAACACAGTTTATGATCCTTTGCAACCTGAATTAGACTCATTCAAGGAGGAGTTAGATAAATATTTTAAGAATCAT  
ACATCACCAGATGTTGATTTAGGTGACATCTCTGGCATTAAATGCTTCAGTTGTAAACATTCAAAAAGAAATTGACCGCCTCAAT  
GAGGTTGCCAAGAATTTAAATGAATCTCTCATCGATCTCCAAGAACTTGGAAAGTATGAGCAGTATATAAAATGGCCATGGTAC  
ATTTGGCTAGGTTTTATAGCTGGCTTGATTGCCATAGTAATGGTGCACAATTATGCTTTGCTGTATGACCAGTTGCTGTAGTTGTC  
TCAAGGGCTGTTGTTCTTGTGGATCCTGCTGCAAATTTGATGAAGACGACTCTGAGCTAGTGCTCAAAGGAGTCAAATTACATT  
ACACATAA

|                                        |                  |                                                                                                                                                                                                                                                                                                                                                                                                                                                                                                                                                                                                                                                                                                                                                                                                                                                                                                                                                                                                                                                                                                                                                                                                                                                                                                                                                                                                                                                                                                                                                                                                                                                                                                                                                                                                                                                                                                                                                                                                                                                                                                                                                                                                                                                                                                                                                                                                 |
|----------------------------------------|------------------|-------------------------------------------------------------------------------------------------------------------------------------------------------------------------------------------------------------------------------------------------------------------------------------------------------------------------------------------------------------------------------------------------------------------------------------------------------------------------------------------------------------------------------------------------------------------------------------------------------------------------------------------------------------------------------------------------------------------------------------------------------------------------------------------------------------------------------------------------------------------------------------------------------------------------------------------------------------------------------------------------------------------------------------------------------------------------------------------------------------------------------------------------------------------------------------------------------------------------------------------------------------------------------------------------------------------------------------------------------------------------------------------------------------------------------------------------------------------------------------------------------------------------------------------------------------------------------------------------------------------------------------------------------------------------------------------------------------------------------------------------------------------------------------------------------------------------------------------------------------------------------------------------------------------------------------------------------------------------------------------------------------------------------------------------------------------------------------------------------------------------------------------------------------------------------------------------------------------------------------------------------------------------------------------------------------------------------------------------------------------------------------------------|
| <b>Mu<br/>tant<br/>S<br/>gen<br/>e</b> | <b>38<br/>22</b> | ATGTTTGTTTTTTTTGTATTGCCACTAGTCTCTAGTCAGTGTGTTAATCTTACAACCAGAACTCAATTACCCCCTGCATACAC<br>TAATTCCTTTCACACGTGGTGTATTACCCTGACAAAGTTTTAGATCCTCAGTTTTACATTCAACTCAGGACTTGTCTTACCTT<br>TCTTTTCCAATGTTACTTGGTTCATGCTATAACATGTCTCTGGGACCAATGGTACTAAGAGGTTTGCTAACCCCTGTCCTACCATT<br>AATGATGGTGTATTATTTGCTTCCACTGAGAAGTCTAACATAATAAGAGGCTGGATTTTTGGTACTACTTTAGATTTCGAAGACCC<br>AGTCCCTACTTATTGTTAATAACGCTACTAATGTTGTTATTAAGTCTGTGAATTTCAATTTTGTAAATGATCCATTTTTGGGTGTT<br>TATTACCACAAAACAACAAAAGTTGGATGGAAAGTGAGTTCAGAGTTTATTCTAGTGCGAATAATTGCACTTTTGAATATGTC<br>TCTCAGCCTTTTCTTATGGACCTTGAAGGAAAACAGGGTAATTTCAAAAATCTTAGGGAAATTTGTGTTAAGAATATTGATGGTT<br>ATTTTAAAATATATTCTAAGCACACGCCTATTAATTTAGTGCCTGGTCTCCCTCAGGGTTTTTTCGGCTTTAGAACCATTGGTAGA<br>TTTGCCAATAGGTATTAACATCACTAGGTTTCAAACCTTACTTGCTTTACATATAAGTTATTTGACTCCTGGTGATTCTTCTTCAG<br>GTTGGACAGCTGGTGCTGCAGCTTATTATGTGGGTTATCTTCAACCTAGGACTTTTCTATTAATAATAATGAAAATGGAACCAT<br>TACAGATGCTGTAGACTGTGCACTTGACCCTCTCTCAGAAACAAAGTGTACGTTGAAATCCTTCACTGTAGAAAAGGAATCTA<br>TCAAACCTTCTAACTTTAGAGTCCAACCAACAGAATCTATTGTTAGATTTCCCTAATATTACAAACTTGTGCCCTTTTGGTGAAGTT<br>TTTAAACGCCACCAGATTTGCATCTGTTTATGCTTGGAACAGGAAGAGAATCAGCAACTGTGTTGCTGATTATTCTGTCTATATA<br>ATCCGCATCATTTTCCACTTTTAAAGTGTATGGAGTGTCTCCTACTAAATTAATGATCTCTGCTTACTAATGTCTATGCAGAT<br>TCATTTGTAATTAGAGGTGATGAAGTCAGACAAATCGCTCCAGGGCAAACCTGGAAATATTGCTGATTATAATTATAAATTACCA<br>GATGATTTTACAGGCTGCGTTATAGCTTGGAAATCTAACAATCTTGATTCTAAGGTTGGTGGTAATTATAATTACCGGTTTAGAT<br>TGTTTAGGAAGTCTAATCTCAAACCTTTGAGAGAGATATTTCAAACCTGAAATCTATCAGGCCGGTAGCAAACCTTGTAATGGTG<br>TTCAAGGTTTTAATTGTTACTTTCCTTTACAATCATATGGTTTCCAACCCACTTATGGTGTGGTTACCAACCATAACAGAGTAGT<br>AGTACTTTCTTTTGAACCTTCTACATGCACCAGCAACTGTTTGTGGACCTAAAAAGTCTACTAATTTGGTTAAAAACAATGTGTC<br>AATTTCAAACCTCAATGGTTTAAACAGGCACAGGTGTTCTTACTGAGTCTAACAAAAAGTTTCTGCCTTTCCAACAATTTGGCAGAG<br>ACATTGATGACACTACTGATGCTGTCCGTGATCCACAGACACTTGAGATTCTTGACATTACACCATGTTCTTTTGGTGGTGTGTCAG<br>TGTTATAACACCAGGAACAAATACTTCTAACCAGGTTGCTGTTCTTTATCAGGGTGTAACTGCACAGAAGTCCCTGTTGCTATT<br>CATGCAGATCAACTTACTCTACTTGGCGTGTATTCTACAGGTTCTAATGTTTTTCAAACACGTGCAGGCTGTTAATAGGGG<br>CTGAACATGTCAACAACCTCATATGAGTGTGACATACCCATTGGTGCAGGTATATGCGCTAGTTATCAGACTCAGACTAATTCTC<br>ATCGGCGGGCACGTAGTGTAGCTAGTCAATCCATCATTGCCTACACTATGTCACCTGGTGTAGAAAATTCAGTTGCTTACTCTAA<br>TAACTCTATTGCCATACCCATAAATTTTACTATTAGTGTACCACAGAAATCTACCAGTGTCTATGACCAAGACATCAGTAGAT |
|----------------------------------------|------------------|-------------------------------------------------------------------------------------------------------------------------------------------------------------------------------------------------------------------------------------------------------------------------------------------------------------------------------------------------------------------------------------------------------------------------------------------------------------------------------------------------------------------------------------------------------------------------------------------------------------------------------------------------------------------------------------------------------------------------------------------------------------------------------------------------------------------------------------------------------------------------------------------------------------------------------------------------------------------------------------------------------------------------------------------------------------------------------------------------------------------------------------------------------------------------------------------------------------------------------------------------------------------------------------------------------------------------------------------------------------------------------------------------------------------------------------------------------------------------------------------------------------------------------------------------------------------------------------------------------------------------------------------------------------------------------------------------------------------------------------------------------------------------------------------------------------------------------------------------------------------------------------------------------------------------------------------------------------------------------------------------------------------------------------------------------------------------------------------------------------------------------------------------------------------------------------------------------------------------------------------------------------------------------------------------------------------------------------------------------------------------------------------------|

|                                  |                 |                                                                                                                                                                                                                                                                                                                                                                                                                                                                                                                                                                                                                                                                                                                                                                                                                                                                                                                                                                                                                                                                                                                                                                                                                                                                                                                                                                                                                                                                                                                                                                                                                                                                                                                                                                                                     |
|----------------------------------|-----------------|-----------------------------------------------------------------------------------------------------------------------------------------------------------------------------------------------------------------------------------------------------------------------------------------------------------------------------------------------------------------------------------------------------------------------------------------------------------------------------------------------------------------------------------------------------------------------------------------------------------------------------------------------------------------------------------------------------------------------------------------------------------------------------------------------------------------------------------------------------------------------------------------------------------------------------------------------------------------------------------------------------------------------------------------------------------------------------------------------------------------------------------------------------------------------------------------------------------------------------------------------------------------------------------------------------------------------------------------------------------------------------------------------------------------------------------------------------------------------------------------------------------------------------------------------------------------------------------------------------------------------------------------------------------------------------------------------------------------------------------------------------------------------------------------------------|
|                                  |                 | <p>TGTACAATGTACATTTGTGGTGATTCAACTGAATGCAGCAATCTTTTGTGCAATATGGCAGTTTTTGTACACAATTAACCGTG<br/> CTTTAACTGGAATAGCTGTTGAACAAGACAAAAACCCCAAGAAGTTTTTGCACAAGTCAAACAAATTTACAAAACACCACCA<br/> ATTAAGATTTTGGTGGTTTTAATTTTTCACAAATATTACCAGATCCATCAAACCAAGCAAGAGGTCATTTATTGAAGATCTAC<br/> TTTTCAACAAAGTGACACTTGCAGATGCTGGCTTCATCAAACAATATGGTGATTGCCCTGGTGATATTGCTGCTAGAGACCTCAT<br/> TTGTGCACAAAAGTTTAACGGCCTTACTGTTTTGCCACCTTTGCTCACAGATGAAATGATTGCTCAATACACTTCTGCACTGTTA<br/> GCGGGTACAATCACTTCTGGTTGGACCTTTGGTGCAGGTGCTGCATTACAAATACCATTTGCTATGCAAATGGCTTATAGGTTTA<br/> ATGGTATTGGAGTTACACAGAATGTTCTCTATGAGAACCAAAAATTGATTGCCAACCAATTTAATAGTGCTATTGGCAAAATTC<br/> AAGACTCACTTTCTTCCACAGCAAGTGCACCTTGGAAAACCTCAAGATGTGGTCAACCAAAAATGCACAAGCTTTAAACACGCTTG<br/> TTAAACAACCTTAGCTCCAATTTTGGTGCAATTTCAAGTGTTTTAAATGATATCCTTGCACGTCTTGACAAAGTTGAGGCTGAAGT<br/> GCAAATTGATAGGTTGATCACAGGCAGACTTCAAAGTTTGCAGACATATGTGACTCAACAATTAATTAGAGCTGCAGAAATCA<br/> GAGCTTCTGCTAATCTTGCTGCTACTAAAATGTCAGAGTGTGTACTTGGACAATCAAAAAGAGTTGATTTTTGTGGAAAGGGCT<br/> ATCATCTTATGTCCTTCCCTCAGTCAGCACCTCATGGTGTAGTCTTCTTGCATGTGACTTATGTCCTTGCACAAGAAAAGAACTT<br/> CACAACCTGCTCCTGCCATTTGTCATGATGGAAAAGCACACTTTCCTCGTGAAGGTGTCTTTGTTTCAAATGGCACACACTGGTTT<br/> GTAACACAAAGGAATTTTATGAACCACAAATCATTACTACACACAACACATTTGTGTCTGGTAACTGTGATGTTGTAATAGGA<br/> ATTGTCAACAACACAGTTTATGATCCTTTGCAACCTGAATTAGACTCATTCAAGGAGGAGTTAGATAAATATTTTAAGAATCAT<br/> ACATCACCAGATGTTGATTTAGGTGACATCTCTGGCATTAAATGCTTCAGTTGTAAACATTCAAAAAGAAATTGACCGCCTCAAT<br/> GAGGTTGCCAAGAATTTAAATGAATCTCTCATCGATCTCCAAGAACTTGGAAAGTATGAGCAGTATATAAAATGGCCATGGTAC<br/> ATTTGGCTAGGTTTTATAGCTGGCTTGATTGCCATAGTAATGGTGACAATTATGCTTTGCTGTATGACCAGTTGCTGTAGTTGTC<br/> TCAAGGGCTGTTGTTCTTGTGGATCCTGCTGCAAATTTGATGAAGACGACTCTGAGCTAGTGCTCAAAGGAGTCAAATTACATT<br/> ACACATAA</p> |
| <b>S-<br/>Orf<br/>8<br/>gene</b> | <b>36<br/>6</b> | <p>ATGAAATTTCTGTTTTCTTAGGAATCATCACAACCTGTAGCTGCATTTACCAAGAATGTAGTTTACAGTCATGTAACATC<br/> AACCATATGTAGTTGATGACCCGTGTCCTATTCACCTTCTATTCTAAATGGTATATTAGAGTAGGAGCTAGAAAATCAGCACCTTT<br/> AATTGAATTGTGCGTGGATGAGGCTGGTTCTAAATCACCCATTCAGTACATCGATATCGGTAATTATACAGTTTCTGTTACCT<br/> TTTACAATTAATTGCCAGGAACCTAAATGGGTAGTCTTGTAGTGCGTTGTTCTGTTCTATGAAGACTTTTTAGAGTATCATGACG<br/> TTCGTGTTGTTTTAGATTCATCTAA</p>                                                                                                                                                                                                                                                                                                                                                                                                                                                                                                                                                                                                                                                                                                                                                                                                                                                                                                                                                                                                                                                                                                                                                                                                                                                                                                                                                                                              |



|             |          |                                                                                                                                                                                                                                                                                                                                                                                                                                                                                                                                                                                                                                                                                                                                                                                                                                                                                                                                                                                                                                                                                                                                                                                                                                                                                                                                                                      |
|-------------|----------|----------------------------------------------------------------------------------------------------------------------------------------------------------------------------------------------------------------------------------------------------------------------------------------------------------------------------------------------------------------------------------------------------------------------------------------------------------------------------------------------------------------------------------------------------------------------------------------------------------------------------------------------------------------------------------------------------------------------------------------------------------------------------------------------------------------------------------------------------------------------------------------------------------------------------------------------------------------------------------------------------------------------------------------------------------------------------------------------------------------------------------------------------------------------------------------------------------------------------------------------------------------------------------------------------------------------------------------------------------------------|
| L-Orf8 gene | 36<br>6  | ATGAAATTTCTTGTTTTCTTAGGAATCATCACAACCTGTAGCTGCATTTACCAAGAATGTAGTTTACAGTCATGTACTCAACATC<br>AACCATATGTAGTTGATGACCCGTGTCCTATTCACCTTCTATTCTAAATGGTATATTAGAGTAGGAGCTAGAAAATCAGCACCTTT<br>AATTGAATTGTGCGTGGATGAGGCTGGTTCTAAATCACCCATTCAGTACATCGATATCGGTAATTATACAGTTTCCTGTTTACCT<br>TTTACAATTAATTGCCAGGAACCTAAATTGGGTAGTCTTGTAGTGCGTTGTTTCGTTCTATGAAGACTTTTTAGAGTATCATGACG<br>TTCGTGTTGTTTTAGATTTTCATCTAA                                                                                                                                                                                                                                                                                                                                                                                                                                                                                                                                                                                                                                                                                                                                                                                                                                                                                                                                                                    |
| NP gene     | 12<br>60 | ATGTCTGATAATGGACCCCAAATCAGCGAAATGCACCCCGCATTACGTTTGGTGGACCCTCAGATTCAACTGGCAGTAACCAG<br>AATGGAGAACGCAGTGGGGCGCGATCAAAACAACGTCCGGCCCAAGGTTTACCCAATAATACTGCGTCTTGGTTCACCGCTCTC<br>ACTCAACATGGCAAGGAAGACCTTAAATTCCTCGAGGACAAGGCGTTCCAATTAACACCAATAGCAGTCCAGATGACCAAAT<br>TGGCTACTACCGAAGAGCTACCAGACGAATTCGTGGTGGTGACGGTAAAATGAAAGATCTCAGTCCAAGATGGTATTTCTACTA<br>CCTAGGAACTGGGCCAGAAGCTGGACTTCCCTATGGTGCTAACAAAGACGGCATCATATGGGTTGCAACTGAGGGAGCCTTGA<br>ATACACCAAAGATCACATTGGCACCCGCAATCCTGCTAACAAATGCTGCAATCGTGCTACAACCTTCCCTCAAGGAACAACATTGC<br>CAAAGGCTTCTACGCAGAAGGGAGCAGAGGCGGCAGTCAAGCCTCTTCTCGTTCCTCATCACGTAGTCGCAACAGTTCAAGA<br>AATTCAACTCCAGGCAGCAGTAGGGGAACTTCTCCTGCTAGAATGGCTGGCAATGGCGGTGATGCTGCTCTTGCTTTGCTGCTG<br>CTTGACAGATTGAACCAGCTTGAGAGCAAAATGTCTGGTAAAGGCCAACAAACAAGGCCAAACTGTCACTAAGAAATCTGC<br>TGCTGAGGCTTCTAAGAAGCCTCGGCAAAAACGTACTGCCACTAAAGCATAACAATGTAACACAAGCTTTTCGGCAGACGTGGTC<br>CAGAACAACCCAAGGAAATTTGGGGACCAGGAACTAATCAGACAAGGAACTGATTACAAACATTGGCCGCAAATTGCACA<br>ATTTGCCCCAGCGCTTCAGCGTTCTTCGGAATGTCCGCGCATTGGCATGGAAGTACACCTTCGGGAACGTGGTTGACCTACAC<br>AGGTGCCATCAAATTGGATGACAAAGATCCAAATTTCAAAGATCAAGTCATTTTGCTGAATAAGCATATTGACGCATACAAAA<br>CATTCCCACCAACAGAGCCTAAAAAGGACAAAAAGAAGAAGGCTGATGAAACTCAAGCCTTACCGCAGAGACAGAAGAAACA<br>GCAAACCTGTGACTCTTCTCCTGCTGCAGATTTGGATGATTTCTCCAAACAATTGCAACAATCCATGAGCAGTGCTGACTCAACT<br>CAGGCCTAA |

**Note:** NP gene, the gene encoding the nucleoprotein of SARS-CoV-2 (nt 28,274-29,533, NCBI accession number MN908947); Wild-type S gene, gene fragment of SARS-CoV-2 spike protein (nt 21,563-25,384, NCBI accession number MN908947); Mutant S gene, gene fragments of SARS-CoV-2 spike protein including mutations: L5F, D80A, D215G, R246I, K417N, L452R/Q, Y453F, E484Q, N501Y, A570D, D614G, P681H, A701V, T716I, S982A, D1118H, P1263L; S-Orf8 gene, S lineage gene fragment of open reading frame 8 (ORF8, nt 27,894-28,259, NCBI accession number MN908947); L-Orf8 gene, L lineage fragment of SARS-CoV-2 ORF8 with mutation of S84L.

**Supplementary Table S3. Information of clinical samples**

| <b>SARS-CoV-2 variants</b> | <b>Sample ID</b> | <b>Cycle threshold value (ORF1a/b)</b> | <b>Cycle threshold value (N)</b> |
|----------------------------|------------------|----------------------------------------|----------------------------------|
| <b>Wild-type</b>           | 20SF5770         | 37                                     | 36                               |
|                            | 20SF5783         | 28                                     | 28                               |
|                            | 20SF5774         | 21                                     | 21                               |
|                            | 20SF5787         | 21                                     | 22                               |
|                            | 20SF5788         | 28                                     | 28                               |
| <b>Aplha</b>               | XG01774          | 21                                     | 20                               |
|                            | XG02064          | 24                                     | 23                               |
|                            | XG03594          | 17                                     | 16                               |
|                            | XG03595          | 26                                     | 26                               |
|                            | XG03596          | 15                                     | 15                               |
|                            | XG03607          | 18                                     | 16                               |
|                            | XG03623          | 16                                     | 15                               |
|                            | XG04704          | 18                                     | 17                               |
|                            | XG04850          | 21                                     | 22                               |
|                            | XG08145          | 24                                     | 22                               |
|                            | XG08337          | 17                                     | 16                               |
| <b>Beta</b>                | XG02289          | 23                                     | 23                               |
|                            | XG03246          | 18                                     | 18                               |
|                            | XG03255          | 19                                     | 19                               |
|                            | XG03240          | 14                                     | 13                               |
|                            | XG05824          | 18                                     | 17                               |
|                            | XG07753          | 27                                     | 26                               |
|                            | XG07933          | 22                                     | 22                               |

|              | XG08741 | 31 | 31 |
|--------------|---------|----|----|
| <b>Delta</b> | XG08547 | 20 | 19 |
|              | XG08859 | 18 | 19 |
|              | XG09082 | 16 | 17 |
|              | XG08688 | 21 | 21 |
|              | XG08689 | 15 | 15 |
|              | XG08692 | 16 | 16 |
|              | XG08693 | 16 | 16 |
|              | XG08694 | 18 | 16 |

**Supplementary Table S4. Summary of guide RNA (crRNA) sequences**

| <b>crRNA</b> | <b>Mutations detected</b> | <b>On-target</b>                 | <b>Off-target</b>       | <b>Sequence (5'→3')</b>                   |
|--------------|---------------------------|----------------------------------|-------------------------|-------------------------------------------|
| crRNA-N1     | NA                        | NP gene                          | NA                      | UAAUUUCUACUAAGUGUAGACCCCCAGCGCUUCAGCGUUC  |
| crRNA-N2     | NA                        | NP gene                          | NA                      | UAAUUUCUACUAAGUGUAGAGUGGACCCUCAGAUUCAACU  |
| crRNA-N3     | NA                        | NP gene                          | NA                      | UAAUUUCUACUAAGUGUAGACCCAAUAAUACUGCGUCUUG  |
| crRNA-N4     | NA                        | NP gene                          | NA                      | UAAUUUCUACUAAGUGUAGAUACUACCUAGGAACUGGGCC  |
| crRNA-N5     | NA                        | NP gene                          | NA                      | UAAUUUCUACUAAGUGUAGACUGCUGCUUGACAGAUUGAA  |
| crRNA-S      | NA                        | Both wild-type and mutant S gene | NA                      | UAAUUUCUACUAAGUGUAGAAUAGGGGCUGAACAUUGUCA  |
| crRNA-S-5F   | L5F<br>(Spike protein)    | Mutant S gene (5F)               | Wild-type S gene (5I)   | UAAUUUCUACUAAGUGUAGAUUUUAUUGCCACUAGUCUCU  |
| crRNA-S-80A  | D80A<br>(Spike protein)   | Mutant S gene (80A)              | Wild-type S gene (80D)  | UAAUUUCUACUAAGUGUAGACUAACCCUGUCCUACCAUUU  |
| crRNA-S-215G | D215G<br>(Spike protein)  | Mutant S gene (215G)             | Wild-type S gene (215D) | UAAUUUCUACUAAGUGUAGAGUGCGUGGUCUCCCUCAGGG  |
| crRNA-S-246I | R246I<br>(Spike protein)  | Mutant S gene (246I)             | Wild-type S gene (246R) | UAAUUUCUACUAAGUGUAGACAUAUAAGUUAUUUGACUCC  |
| crRNA-S-417K | K417N<br>(Spike protein)  | Wild-type S gene (417K)          | Mutant S gene (417N)    | UAAUUUCUACUAAGUGUAGAAACGAUUGCUGAUUAUAAU   |
| crRNA-S-417N | K417N<br>(Spike protein)  | Mutant S gene (417N)             | Wild-type S gene (417K) | UAAUUUCUACUAAGUGUAGAAACUAUUGCUGAUUAUAAU   |
| crRNA-S-452R | L452R<br>(Spike protein)  | Mutant S gene (452R)             | Wild-type S gene (452L) | UAAUUUCUACUAAGUGUAGACCGAUUAUAGAUUGUUUAGGA |
| crRNA-S-452Q | L452Q<br>(Spike protein)  | Mutant S gene (452Q)             | Wild-type S gene (452L) | UAAUUUCUACUAAGUGUAGACCAUAUAGAUUGUUUAGGA   |

|               |                           |                            |                             |                                           |
|---------------|---------------------------|----------------------------|-----------------------------|-------------------------------------------|
| crRNA-S-453F  | Y453F<br>(Spike protein)  | Mutant S gene<br>(453F)    | Wild-type S gene<br>(453Y)  | UAAUUUCUACUAAGUGUAGAGAUUGUUUAGGAAGUCUAAU  |
| crRNA-S-478T  | T478K<br>(Spike protein)  | Wild-type S gene<br>(478T) | Mutant S gene<br>(478K)     | UAAUUUCUACUAAGUGUAGAAAGGGGUGCUACCGGCCUGA  |
| crRNA-S-478K  | T478K<br>(Spike protein)  | Mutant S gene<br>(478K)    | Wild-type S gene<br>(478T)  | UAAUUUCUACUAAGUGUAGAAAGGGUUGCUACCGGCCUGA  |
| crRNA-S-484K  | E484K<br>(Spike protein)  | Mutant S gene<br>(484K)    | Wild-type S gene<br>(484E)  | UAAUUUCUACUAAGUGUAGAACACCAUACAAGGUGUGCU   |
| crRNA-S-484Q  | E484Q<br>(Spike protein)  | Mutant S gene<br>(484Q)    | Wild-type S gene<br>(484E)  | UAAUUUCUACUAAGUGUAGAAAUGGUGUACAAGGUUUUAA  |
| crRNA-S-501N  | N501Y<br>(Spike protein)  | Wild-type S gene<br>(501N) | Mutant S gene<br>(501Y)     | UAAUUUCUACUAAGUGUAGACAACCCACUAAUGGUGUUGG  |
| crRNA-S-570D  | A570D<br>(Spike protein)  | Mutant S gene<br>(570D)    | Wild-type S gene<br>(570A)  | UAAUUUCUACUAAGUGUAGAGCAGAGACAUUGAUGACACU  |
| crRNA-S-614D  | D614G<br>(Spike protein)  | Wild-type S gene<br>(614D) | Mutant S gene<br>(614G)     | UAAUUUCUACUAAGUGUAGAUCAGGACGUU AACUGCACAG |
| crRNA-S-701V  | A701V<br>(Spike protein)  | Mutant S gene<br>(701V)    | Wild-type S gene<br>(701A)  | UAAUUUCUACUAAGUGUAGAUACACCAAGUGACAUAGUGU  |
| crRNA-S-716I  | T716I<br>(Spike protein)  | Mutant S gene<br>(716I)    | Wild-type S gene<br>(716T)  | UAAUUUCUACUAAGUGUAGAAUGGGUAUGGCAAUAGAGUU  |
| crRNA-S-982S  | S982A<br>(Spike protein)  | Wild-type S gene<br>(982S) | Mutant S gene<br>(982A)     | UAAUUUCUACUAAGUGUAGAACGUCUUGACAAAGUUGAGG  |
| crRNA-S-1263L | P1263L<br>(Spike protein) | Mutant S gene<br>(1263L)   | Wild-type S gene<br>(1263P) | UAAUUUCUACUAAGUGUAGAAGCACUAGCUCAGAGUCGUC  |
| crRNA-Orf8    | S84L (ORF8 protein)       | L-Orf8 gene (84L)          | S-Orf8 gene (84S)           | UAAUUUCUACUAAGUGUAGACCUUUUACAAUAAUUGCCA   |

Note: NA, not available; NP gene, the gene encoding the nucleoprotein of SARS-CoV-2 (nt 28,274-29,533, NCBI accession number MN908947); Wild-type S gene, gene fragment of SARS-CoV-2 spike protein (nt 21,563-25,384, NCBI accession number MN908947); Mutant S gene, gene fragments of SARS-CoV-2 spike protein including mutations: L5F, D80A, D215G, R246I, K417N, L452R/Q, Y453F, T478K, E484K/Q, N501Y, A570D, D614G, P681H, A701V, T716I, S982A, D1118H, P1263L; S-Orf8 gene, S lineage gene fragment of open reading frame 8 (ORF8, nt 27,894-28,259, NCBI accession number MN908947); L-Orf8 gene, L lineage fragment of SARS-CoV-2 ORF8 with mutation of S84L.

**Supplementary Table S5. Summary of primer sequences**

| Primer              | Sequence (5'→3')           |
|---------------------|----------------------------|
| N-gene_F            | ATGTCTGATAATGGACC          |
| N-gene_R            | GGTGTGACTTCCATGCC          |
| S-gene_F1           | CTAGTGATGTTCTTGTT          |
| S-gene_R1           | TGCACAGTCTACAGCATC         |
| S-gene_F2           | ACTTGTGCCCTTTTGGTGAAG      |
| S-gene_R2           | GCTATTCCAGTTAAAGCACGGT     |
| S-gene_F3           | AGACTCACTTTCTTCCACAGCAA    |
| S-gene_R3           | GTATCGTTGCAGTAGCGCGA       |
| Orf8-gene_F         | AGGAATCATCACAACCTGTAGC     |
| Orf8-gene_R         | AACGAACAACGCACTACAAGAC     |
| K417N_F             | ATCGCTCCAGGGCAAATTTGAAA    |
| K417N_R             | GCTATTCCAGTTAAAGCACGGT     |
| L452R_F             | AGGTTGGTGGTAATTATATTTAC    |
| L452R_R             | AGTACTACTACTCTGTATGGTTGGT  |
| T478K-R             | AACACCATTTC AAGGT          |
| E484Q_F             | AGCACACCTTTTAATGGTGTT      |
| E484Q_R             | AGTACTACTACTCTGTATGGTTGGT  |
| HCoV 229E NP gene_F | CTACAGTCAAATGGGCTGATGCATCT |
| HCoV 229E NP gene_R | TGACTTCATCAATTATGTCAG      |
| HCoV OC43 NP gene_F | TCCAGTAGTAGAGCGTCCTCTGGA   |
| HCoV OC43 NP gene_R | GCTGATGTCCTCTGCAGTCAACTCTA |
| HCoV HKU1 NP gene_F | ATACTCCCGGTCATTATGCTGGAA   |
| HCoV HKU1 NP gene_R | ACATAAGGATCATCAAGAGTAGC    |

|                           |                                 |
|---------------------------|---------------------------------|
| HCoV 229E S gene outer_F  | TTGTTGCATATGCCTTGTTGCATATTGC    |
| HCoV 229E S gene outer__R | ATCTTTTCAACGTCGTAATAAGGAAGTTTAG |
| HCoV 229E S gene inner_F  | ACTCTGTTTGCAACGGCTGTGTTGGT      |
| HCoV 229E S gene inner__R | ACTCACCACAAAGATGAGCACGACTG      |
| HCoV OC43 S gene outer_F  | TATAAGTATTGATACTGTTGATGTTACTA   |
| HCoV OC43 S gene outer__R | GTCCTTGAGATTGATGTAGCTATGA       |
| HCoV OC43 S gene inner_F  | CAGGTTCCACATATCGTAATAT          |
| HCoV OC43 S gene inner__R | AGCTATACCTCTATTACCAGCAATGCA     |
| HCoV HKU1 S gene outer_F  | GCCTACAACATTAGCTGTTATA          |
| HCoV HKU1 S gene outer__R | ACACACTCATTAACCTTCTC            |
| HCoV HKU1 S gene inner_F  | GTTAAGAATACTAAGTTGTATGT         |
| HCoV HKU1 S gene inner__R | AGCCTATCAATCTGAACCTGA           |
| HCoV 229E Orf3 gene_F     | CTCTAGGTTTGTTCACATTGCA          |
| HCoV 229E Orf3 gene_R     | TCTGTGTTGACTATTCCAACAGC         |
| HCoV OC43 Orf5 gene_F     | ACTTCACATGACGACTAAGTT           |
| HCoV OC43 Orf5 gene_R     | ACAATCCACCATCACATGA             |
| HCoV HKU1 Orf4 gene_F     | ATGGACGTTTGGAGACCTAGC           |
| HCoV HKU1 Orf4 gene_R     | TCAACCATACTTATTAAGTGC           |



**Supplementary Table S6. Comparison of CRISPR-Cas12a, RT-PCR and whole genome sequencing in detecting SARS-CoV-2 variants**

| <b>Characteristics</b>     | <b>CRISPR-Cas12a</b>                                                                                                                                                                                                                          | <b>RT-PCR(1, 2)</b>                                                                                                                                                                                                                                                                                | <b>Whole genome sequencing<sup>§</sup></b>                                                                                                                                                |
|----------------------------|-----------------------------------------------------------------------------------------------------------------------------------------------------------------------------------------------------------------------------------------------|----------------------------------------------------------------------------------------------------------------------------------------------------------------------------------------------------------------------------------------------------------------------------------------------------|-------------------------------------------------------------------------------------------------------------------------------------------------------------------------------------------|
| <b>Procedure</b>           | <ol style="list-style-type: none"> <li>1. Amplification plus Cas12 cleavage (1.0-2h)</li> <li>2. Amplification-free Cas12 system (20-30 min)</li> </ol>                                                                                       | <ol style="list-style-type: none"> <li>1. Amplification of target gene (1.5-2h)</li> <li>2. Detection (0-30min) depending on different assays</li> </ol>                                                                                                                                           | <ol style="list-style-type: none"> <li>1. Library preparations (5-7 h)</li> <li>2. Sequencing (17-32 h)</li> <li>3. Bioinformatic analysis (1-2 h)</li> </ol>                             |
| <b>Assay results</b>       | Qualitative/Semi-quantitative / diagnosis / genotyping                                                                                                                                                                                        | Quantitative / diagnosis / genotyping                                                                                                                                                                                                                                                              | Qualitative / genotyping / characterizing mutations                                                                                                                                       |
| <b>Limits of detection</b> | 1-10 copies per $\mu\text{L}$ or higher                                                                                                                                                                                                       | $\sim 1$ copies per $\mu\text{L}$                                                                                                                                                                                                                                                                  | Not applicable                                                                                                                                                                            |
| <b>Estimated cost</b>      | \$4 per sample                                                                                                                                                                                                                                | \$3 per sample                                                                                                                                                                                                                                                                                     | \$87 per sample                                                                                                                                                                           |
| <b>Benefits</b>            | <ol style="list-style-type: none"> <li>1. Isothermal amplification and reaction at room temperature.</li> <li>2. Easily to find conserved primer sequences to ensure sensitivity.</li> <li>3. Specificity relies on crRNA or gRNA.</li> </ol> | <ol style="list-style-type: none"> <li>1. Matured technology and products.</li> <li>2. PCR equipment and facilities available.</li> </ol>                                                                                                                                                          | <ol style="list-style-type: none"> <li>1. Identify novel mutations and variants.</li> <li>2. Provide complete genome sequence information.</li> </ol>                                     |
| <b>Challenges</b>          | <ol style="list-style-type: none"> <li>1. Limited to known mutations or variants with signature mutations.</li> <li>2. Multiple readouts and mixed mutations need an integrated testing system and algorithm.</li> </ol>                      | <ol style="list-style-type: none"> <li>1. PCR equipment and facility needed;</li> <li>2. Limited to known mutations or variants with signature mutations.</li> <li>3. Difficult to find appropriate primers for specific mutations.</li> <li>4. Not suitable for point-of-care testing.</li> </ol> | <ol style="list-style-type: none"> <li>1. Time-consuming for sequencing.</li> <li>2. Complex bioinformatics pipeline.</li> <li>3. High-end facilities and trained specialists.</li> </ol> |

1. **Wang H, Miller JA, Verghese M, Sibai M, Solis D, Mfuh KO, Jiang B, Iwai N, Mar M, Huang C, Yamamoto F, Sahoo MK, Zehnder J, Pinsky BA.** 2021. Multiplex SARS-CoV-2 Genotyping RT-PCR for Population-Level Variant Screening and Epidemiologic Surveillance. *Journal of clinical microbiology*:Jcm0085921.
2. **Zelyas N, Pabbaraju K, Croxen MA, Lynch T, Buss E, Murphy SA, Shokoples S, Wong A, Kanji JN, Tipples G.** 2021. Precision Response to the Rise of the SARS-CoV-2 B.1.1.7 Variant of Concern by Combining Novel PCR Assays and Genome Sequencing for Rapid Variant Detection and Surveillance. *Microbiology spectrum* **9**:e0031521.

**§Based on Illumina MiSeq sequencing platforms.**

























|                          | 670 | 680 | 690 | 700 | 710 | 720 |
|--------------------------|-----|-----|-----|-----|-----|-----|
| MN908947/Wuhan-Hu-1      | EC  | DI  | PI  | GA  | GI  | CA  |
| BS001137/B.1.1.7/Alpha   | EC  | DI  | PI  | GA  | GI  | CA  |
| BS001138/B.1.1.7/Alpha   | EC  | DI  | PI  | GA  | GI  | CA  |
| BS001139/B.1.1.7/Alpha   | EC  | DI  | PI  | GA  | GI  | CA  |
| BS001140/B.1.1.7/Alpha   | EC  | DI  | PI  | GA  | GI  | CA  |
| MW913362/B.1.1.7/Alpha   | EC  | DI  | PI  | GA  | GI  | CA  |
| MZ266365/B.1.1.7/Alpha   | EC  | DI  | PI  | GA  | GI  | CA  |
| MZ350105/B.1.1.7/Alpha   | EC  | DI  | PI  | GA  | GI  | CA  |
| MZ350109/B.1.1.7/Alpha   | EC  | DI  | PI  | GA  | GI  | CA  |
| MZ888516/B.1.1.7/Alpha   | EC  | DI  | PI  | GA  | GI  | CA  |
| OU562607/B.1.1.7/Alpha   | EC  | DI  | PI  | GA  | GI  | CA  |
| OU514166/B.1.1.7/Alpha   | EC  | DI  | PI  | GA  | GI  | CA  |
| OU538851/B.1.1.7/Alpha   | EC  | DI  | PI  | GA  | GI  | CA  |
| OU538849/B.1.1.7/Alpha   | EC  | DI  | PI  | GA  | GI  | CA  |
| MZ895877/B.1.1.7/Alpha   | EC  | DI  | PI  | GA  | GI  | CA  |
| OU514176/B.1.1.7/Alpha   | EC  | DI  | PI  | GA  | GI  | CA  |
| OU562608/B.1.1.7/Alpha   | EC  | DI  | PI  | GA  | GI  | CA  |
| MW981442/B.1.351/Beta    | EC  | DI  | PI  | GA  | GI  | CA  |
| MZ298839/B.1.351/Beta    | EC  | DI  | PI  | GA  | GI  | CA  |
| MZ913100/B.1.351/Beta    | EC  | DI  | PI  | GA  | GI  | CA  |
| MZ879365/B.1.351/Beta    | EC  | DI  | PI  | GA  | GI  | CA  |
| OU525106/B.1.351/Beta    | EC  | DI  | PI  | GA  | GI  | CA  |
| OU539352/B.1.351/Beta    | EC  | DI  | PI  | GA  | GI  | CA  |
| MZ202314/B.1.351/Beta    | EC  | DI  | PI  | GA  | GI  | CA  |
| MZ298840/B.1.351/Beta    | EC  | DI  | PI  | GA  | GI  | CA  |
| MZ376663/B.1.351/Beta    | EC  | DI  | PI  | GA  | GI  | CA  |
| LC643036/B.1.617.2/Delta | EC  | DI  | PI  | GA  | GI  | CA  |
| LC643044/B.1.617.2/Delta | EC  | DI  | PI  | GA  | GI  | CA  |
| MZ853946/B.1.617.2/Delta | EC  | DI  | PI  | GA  | GI  | CA  |
| MZ854386/B.1.617.2/Delta | EC  | DI  | PI  | GA  | GI  | CA  |
| MZ888532/B.1.617.2/Delta | EC  | DI  | PI  | GA  | GI  | CA  |
| MZ888533/B.1.617.2/Delta | EC  | DI  | PI  | GA  | GI  | CA  |
| MZ896136/B.1.617.2/Delta | EC  | DI  | PI  | GA  | GI  | CA  |
| OU539261/B.1.617.2/Delta | EC  | DI  | PI  | GA  | GI  | CA  |
| MZ854389/B.1.617.2/Delta | EC  | DI  | PI  | GA  | GI  | CA  |
| OU562629/B.1.617.2/Delta | EC  | DI  | PI  | GA  | GI  | CA  |
| OU539690/B.1.617.2/Delta | EC  | DI  | PI  | GA  | GI  | CA  |
| MZ854387/B.1.617.2/Delta | EC  | DI  | PI  | GA  | GI  | CA  |
| OU539784/P.1/Gamma       | EC  | DI  | PI  | GA  | GI  | CA  |
| OU539830/P.1/Gamma       | EC  | DI  | PI  | GA  | GI  | CA  |
| OU539894/P.1/Gamma       | EC  | DI  | PI  | GA  | GI  | CA  |
| MZ477748/P.1/Gamma       | EC  | DI  | PI  | GA  | GI  | CA  |
| MZ477746/P.1/Gamma       | EC  | DI  | PI  | GA  | GI  | CA  |
| MW938104/P.1/Gamma       | EC  | DI  | PI  | GA  | GI  | CA  |
| MZ896179/P.1/Gamma       | EC  | DI  | PI  | GA  | GI  | CA  |
| MZ896359/P.1/Gamma       | EC  | DI  | PI  | GA  | GI  | CA  |
| MZ896669/P.1/Gamma       | EC  | DI  | PI  | GA  | GI  | CA  |
| OU565182/P.1/Gamma       | EC  | DI  | PI  | GA  | GI  | CA  |
| OU492255/P.1/Gamma       | EC  | DI  | PI  | GA  | GI  | CA  |
| MZ911221/B.1.427/Epsilon | EC  | DI  | PI  | GA  | GI  | CA  |
| MZ375854/B.1.427/Epsilon | EC  | DI  | PI  | GA  | GI  | CA  |
| MZ375858/B.1.427/Epsilon | EC  | DI  | PI  | GA  | GI  | CA  |
| MZ943834/B.1.429/Epsilon | EC  | DI  | PI  | GA  | GI  | CA  |
| MZ277390/B.1.429/Epsilon | EC  | DI  | PI  | GA  | GI  | CA  |
| OU282717/B.1.429/Epsilon | EC  | DI  | PI  | GA  | GI  | CA  |
| OU235436/B.1.429/Epsilon | EC  | DI  | PI  | GA  | GI  | CA  |
| MZ687447/B.1.429/Epsilon | EC  | DI  | PI  | GA  | GI  | CA  |
| MZ538882/B.1.617.1/Kappa | EC  | DI  | PI  | GA  | GI  | CA  |
| MZ724425/B.1.617.1/Kappa | EC  | DI  | PI  | GA  | GI  | CA  |
| MZ363839/B.1.617.1/Kappa | EC  | DI  | PI  | GA  | GI  | CA  |
| MZ332524/B.1.617.1/Kappa | EC  | DI  | PI  | GA  | GI  | CA  |
| MZ332527/B.1.617.1/Kappa | EC  | DI  | PI  | GA  | GI  | CA  |
| LC633761/B.1.617.1/Kappa | EC  | DI  | PI  | GA  | GI  | CA  |
| MZ562746/B.1.617.1/Kappa | EC  | DI  | PI  | GA  | GI  | CA  |
| MZ571142/B.1.617.1/Kappa | EC  | DI  | PI  | GA  | GI  | CA  |
| OU168413/B.1.617.1/Kappa | EC  | DI  | PI  | GA  | GI  | CA  |
| MZ026886/B.1.617.1/Kappa | EC  | DI  | PI  | GA  | GI  | CA  |
| OU172184/B.1.617.1/Kappa | EC  | DI  | PI  | GA  | GI  | CA  |
| MZ397173/B.1.617.1/Kappa | EC  | DI  | PI  | GA  | GI  | CA  |
| MZ397176/B.1.617.1/Kappa | EC  | DI  | PI  | GA  | GI  | CA  |
| MZ397175/B.1.617.1/Kappa | EC  | DI  | PI  | GA  | GI  | CA  |
| MZ397177/B.1.617.1/Kappa | EC  | DI  | PI  | GA  | GI  | CA  |
| OU290035/B.1.617.1/Kappa | EC  | DI  | PI  | GA  | GI  | CA  |
| OU265178/B.1.617.1/Kappa | EC  | DI  | PI  | GA  | GI  | CA  |
| OU254949/B.1.617.1/Kappa | EC  | DI  | PI  | GA  | GI  | CA  |
| OU247018/B.1.617.1/Kappa | EC  | DI  | PI  | GA  | GI  | CA  |
| OU061269/B.1.617.1/Kappa | EC  | DI  | PI  | GA  | GI  | CA  |
| OU182966/B.1.617.1/Kappa | EC  | DI  | PI  | GA  | GI  | CA  |
| MZ746235/B.1.617.1/Kappa | EC  | DI  | PI  | GA  | GI  | CA  |
| MZ487800/B.1.617.1/Kappa | EC  | DI  | PI  | GA  | GI  | CA  |
| OU322235/B.1.617.1/Kappa | EC  | DI  | PI  | GA  | GI  | CA  |
| MZ953185/C.37/Lambda     | EC  | DI  | PI  | GA  | GI  | CA  |
| MZ937666/C.37/Lambda     | EC  | DI  | PI  | GA  | GI  | CA  |
| OU356036/C.37/Lambda     | EC  | DI  | PI  | GA  | GI  | CA  |
| OU351967/C.37/Lambda     | EC  | DI  | PI  | GA  | GI  | CA  |
| OU053018/C.37/Lambda     | EC  | DI  | PI  | GA  | GI  | CA  |
| OU268528/C.37/Lambda     | EC  | DI  | PI  | GA  | GI  | CA  |
| OU100999/C.37/Lambda     | EC  | DI  | PI  | GA  | GI  | CA  |
| MZ275295/C.37/Lambda     | EC  | DI  | PI  | GA  | GI  | CA  |
| MZ275301/C.37/Lambda     | EC  | DI  | PI  | GA  | GI  | CA  |
| MZ908711/C.37/Lambda     | EC  | DI  | PI  | GA  | GI  | CA  |
| MZ496613/C.37/Lambda     | EC  | DI  | PI  | GA  | GI  | CA  |
| OU517038/C.37/Lambda     | EC  | DI  | PI  | GA  | GI  | CA  |
| MZ953277/C.37/Lambda     | EC  | DI  | PI  | GA  | GI  | CA  |
| MZ942542/C.37/Lambda     | EC  | DI  | PI  | GA  | GI  | CA  |
| MZ857990/C.37/Lambda     | EC  | DI  | PI  | GA  | GI  | CA  |





















|                          |                |
|--------------------------|----------------|
| MN908947/Wuhan-Hu-1      | SEPVLKGVKLLHYY |
| BS001137/B.1.1.7/Alpha   | SEPVLKGVKLLHYY |
| BS001138/B.1.1.7/Alpha   | SEPVLKGVKLLHYY |
| BS001139/B.1.1.7/Alpha   | SEPVLKGVKLLHYY |
| BS001140/B.1.1.7/Alpha   | SEPVLKGVKLLHYY |
| MW913362/B.1.1.7/Alpha   | SEPVLKGVKLLHYY |
| MZ266365/B.1.1.7/Alpha   | SEPVLKGVKLLHYY |
| MZ350105/B.1.1.7/Alpha   | SEPVLKGVKLLHYY |
| MZ350109/B.1.1.7/Alpha   | SEPVLKGVKLLHYY |
| MZ888516/B.1.1.7/Alpha   | SEPVLKGVKLLHYY |
| OU562607/B.1.1.7/Alpha   | SEPVLKGVKLLHYY |
| OU514166/B.1.1.7/Alpha   | SEPVLKGVKLLHYY |
| OU538851/B.1.1.7/Alpha   | SEPVLKGVKLLHYY |
| OU538849/B.1.1.7/Alpha   | SEPVLKGVKLLHYY |
| MZ895877/B.1.1.7/Alpha   | SEPVLKGVKLLHYY |
| OU514176/B.1.1.7/Alpha   | SEPVLKGVKLLHYY |
| OU562608/B.1.1.7/Alpha   | SEPVLKGVKLLHYY |
| MW981442/B.1.351/Beta    | SEPVLKGVKLLHYY |
| MZ298839/B.1.351/Beta    | SEPVLKGVKLLHYY |
| MZ913100/B.1.351/Beta    | SEPVLKGVKLLHYY |
| MZ879365/B.1.351/Beta    | SEPVLKGVKLLHYY |
| OU525106/B.1.351/Beta    | SEPVLKGVKLLHYY |
| OU539352/B.1.351/Beta    | SEPVLKGVKLLHYY |
| MZ202314/B.1.351/Beta    | SEPVLKGVKLLHYY |
| MZ298840/B.1.351/Beta    | SEPVLKGVKLLHYY |
| MZ376663/B.1.351/Beta    | SEPVLKGVKLLHYY |
| LC643036/B.1.617.2/Delta | SEPVLKGVKLLHYY |
| LC643044/B.1.617.2/Delta | SEPVLKGVKLLHYY |
| MZ853946/B.1.617.2/Delta | SEPVLKGVKLLHYY |
| MZ854386/B.1.617.2/Delta | SEPVLKGVKLLHYY |
| MZ888532/B.1.617.2/Delta | SEPVLKGVKLLHYY |
| MZ888533/B.1.617.2/Delta | SEPVLKGVKLLHYY |
| MZ896136/B.1.617.2/Delta | SEPVLKGVKLLHYY |
| OU539261/B.1.617.2/Delta | SEPVLKGVKLLHYY |
| MZ854389/B.1.617.2/Delta | SEPVLKGVKLLHYY |
| OU562629/B.1.617.2/Delta | SEPVLKGVKLLHYY |
| OU539690/B.1.617.2/Delta | SEPVLKGVKLLHYY |
| MZ854387/B.1.617.2/Delta | SEPVLKGVKLLHYY |
| OU539784/P.1/Gamma       | SEPVLKGVKLLHYY |
| OU539830/P.1/Gamma       | SEPVLKGVKLLHYY |
| OU539894/P.1/Gamma       | SEPVLKGVKLLHYY |
| MZ477748/P.1/Gamma       | SEPVLKGVKLLHYY |
| MZ477746/P.1/Gamma       | SEPVLKGVKLLHYY |
| MW938104/P.1/Gamma       | SEPVLKGVKLLHYY |
| MZ896179/P.1/Gamma       | SEPVLKGVKLLHYY |
| MZ896359/P.1/Gamma       | SEPVLKGVKLLHYY |
| MZ896669/P.1/Gamma       | SEPVLKGVKLLHYY |
| OU565182/P.1/Gamma       | SEPVLKGVKLLHYY |
| OU492255/P.1/Gamma       | SEPVLKGVKLLHYY |
| MZ911221/B.1.427/Epsilon | SEPVLKGVKLLHYY |
| MZ375854/B.1.427/Epsilon | SEPVLKGVKLLHYY |
| MZ375858/B.1.427/Epsilon | SEPVLKGVKLLHYY |
| MZ943834/B.1.429/Epsilon | SEPVLKGVKLLHYY |
| MZ277390/B.1.429/Epsilon | SEPVLKGVKLLHYY |
| OU282717/B.1.429/Epsilon | SEPVLKGVKLLHYY |
| OU235436/B.1.429/Epsilon | SEPVLKGVKLLHYY |
| MZ687447/B.1.429/Epsilon | SEPVLKGVKLLHYY |
| MZ538882/B.1.617.1/Kappa | SEPVLKGVKLLHYY |
| MZ724425/B.1.617.1/Kappa | SEPVLKGVKLLHYY |
| MZ363839/B.1.617.1/Kappa | SEPVLKGVKLLHYY |
| MZ332524/B.1.617.1/Kappa | SEPVLKGVKLLHYY |
| MZ332527/B.1.617.1/Kappa | SEPVLKGVKLLHYY |
| LC633761/B.1.617.1/Kappa | SEPVLKGVKLLHYY |
| MZ562746/B.1.617.1/Kappa | SEPVLKGVKLLHYY |
| MZ571142/B.1.617.1/Kappa | SEPVLKGVKLLHYY |
| OU168413/B.1.617.1/Kappa | SEPVLKGVKLLHYY |
| MZ026886/B.1.617.1/Kappa | SEPVLKGVKLLHYY |
| OU172184/B.1.617.1/Kappa | SEPVLKGVKLLHYY |
| MZ397173/B.1.617.1/Kappa | SEPVLKGVKLLHYY |
| MZ397176/B.1.617.1/Kappa | SEPVLKGVKLLHYY |
| MZ397175/B.1.617.1/Kappa | SEPVLKGVKLLHYY |
| MZ397177/B.1.617.1/Kappa | SEPVLKGVKLLHYY |
| OU290035/B.1.617.1/Kappa | SEPVLKGVKLLHYY |
| OU265178/B.1.617.1/Kappa | SEPVLKGVKLLHYY |
| OU254949/B.1.617.1/Kappa | SEPVLKGVKLLHYY |
| OU247018/B.1.617.1/Kappa | SEPVLKGVKLLHYY |
| OU061269/B.1.617.1/Kappa | SEPVLKGVKLLHYY |
| OU182966/B.1.617.1/Kappa | SEPVLKGVKLLHYY |
| MZ746235/B.1.617.1/Kappa | SEPVLKGVKLLHYY |
| MZ487800/B.1.617.1/Kappa | SEPVLKGVKLLHYY |
| OU322235/B.1.617.1/Kappa | SEPVLKGVKLLHYY |
| MZ953185/C.37/Lambda     | SEPVLKGVKLLHYY |
| MZ937666/C.37/Lambda     | SEPVLKGVKLLHYY |
| OU356036/C.37/Lambda     | SEPVLKGVKLLHYY |
| OU351967/C.37/Lambda     | SEPVLKGVKLLHYY |
| OU053018/C.37/Lambda     | SEPVLKGVKLLHYY |
| OU268528/C.37/Lambda     | SEPVLKGVKLLHYY |
| OU100999/C.37/Lambda     | SEPVLKGVKLLHYY |
| MZ275295/C.37/Lambda     | SEPVLKGVKLLHYY |
| MZ275301/C.37/Lambda     | SEPVLKGVKLLHYY |
| MZ908711/C.37/Lambda     | SEPVLKGVKLLHYY |
| MZ496613/C.37/Lambda     | SEPVLKGVKLLHYY |
| OU517038/C.37/Lambda     | SEPVLKGVKLLHYY |
| MZ953277/C.37/Lambda     | SEPVLKGVKLLHYY |
| MZ942542/C.37/Lambda     | SEPVLKGVKLLHYY |
| MZ857990/C.37/Lambda     | SEPVLKGVKLLHYY |



**Supplementary Figure S1.** Multiple alignment of amino acid sequences of spike protein from different variants of concern or variants of interest from different regions, and compared with wild-type SARS-CoV-2 strain isolated from Wuhan, China (accession number MN908947). SARS-CoV-2 genomes used for alignment were download from NCBI GenBank database and its detailed information was listed in Supplementary Table S1. Multiple alignment was performed and visualized using MAFFT version 7 and ESPript 3.0 respectively. The accession number, pangolin lineage and WHO classification are shown on the left side of the sequences. The red boxes represent identical residues while similar residues are indicated by red letters.

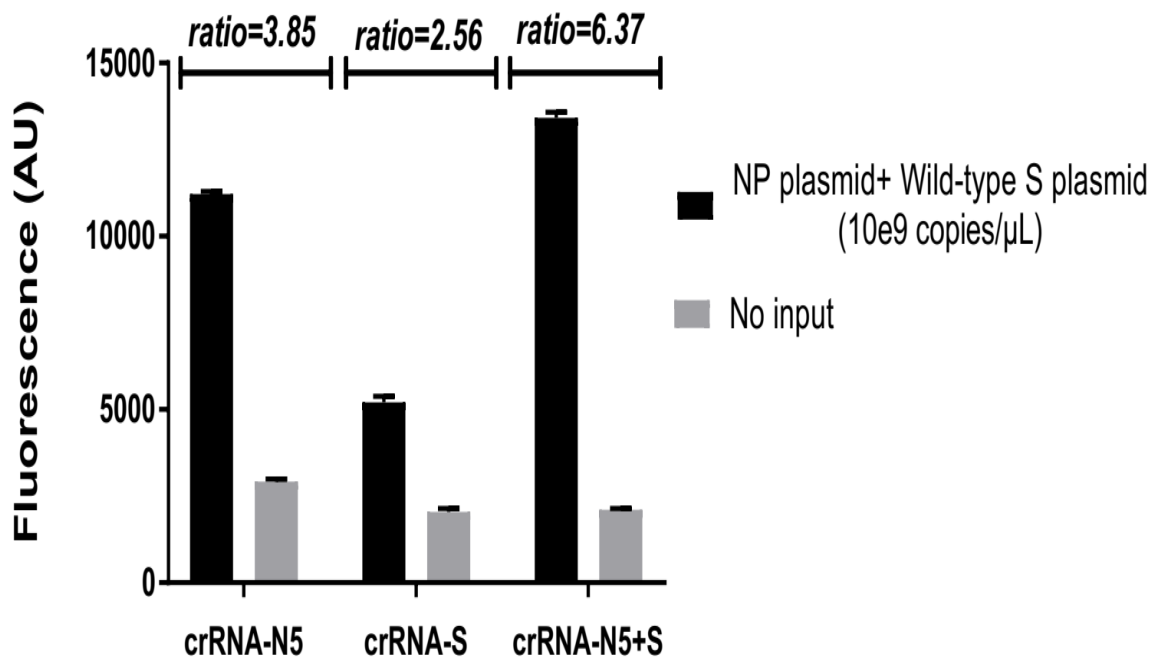

**Supplementary Figure S2.** Enhanced detection sensitivity for the combination of different guide RNAs in CRISPR-Cas12a-based detection.  $10^9$  copies/ $\mu$ L of plasmid DNA for SARS-CoV-2 nucleoprotein (NP) and wild-type spike (S) gene were detected by CRISPR-Cas12a-based assay using crRNA-N5, crRNA-S and the mixture of crRNA-N5 and crRNA-S, respectively. The ration of fluorescence signal for SARS-CoV-2 plasmid DNA over no input control was presented at the top of the figure.

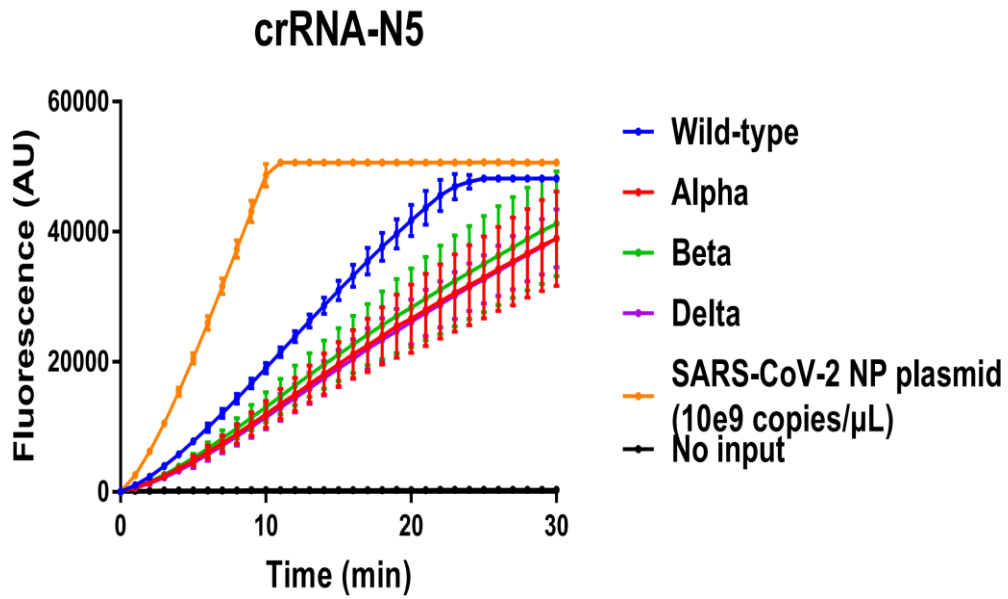

**Supplementary Figure S3.** CRISPR-Cas12a-based detection of SARS-CoV-2 NP gene. Viral RNA templates were extracted from SARS-CoV-2 wild-type strain as well as Alpha, Beta and Delta SARS-CoV-2 variants of concern and amplified by RT-PCR followed by CRISPR-Cas12a-mediated detection by using crRNA-N5. The SARS-CoV-2 NP plasmid DNA ( $10^9$  copies/ $\mu\text{L}$ ) was used as positive control. The fluorescence was measured at different time points and presented as the mean  $\pm$  standard deviation (SD) from 3 replicates. No input, negative control with no plasmid DNA.
